# Supplementary material for: Squalene Synthase As a Target for Chagas Disease Therapeutics
Source: PubMed Central journal article supplement (PMC4006925; doi:10.1371/journal.ppat.1004114), 2014-05-01

**K**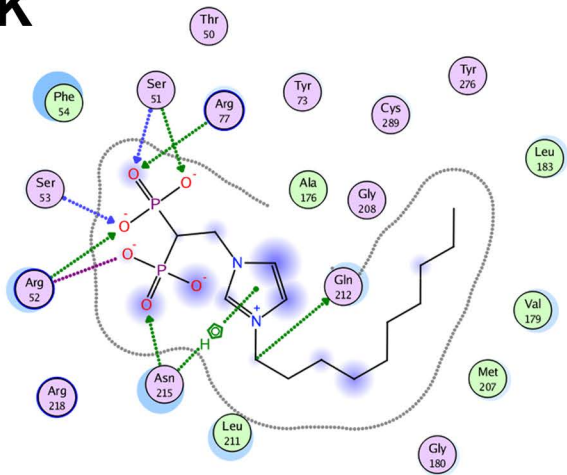**L**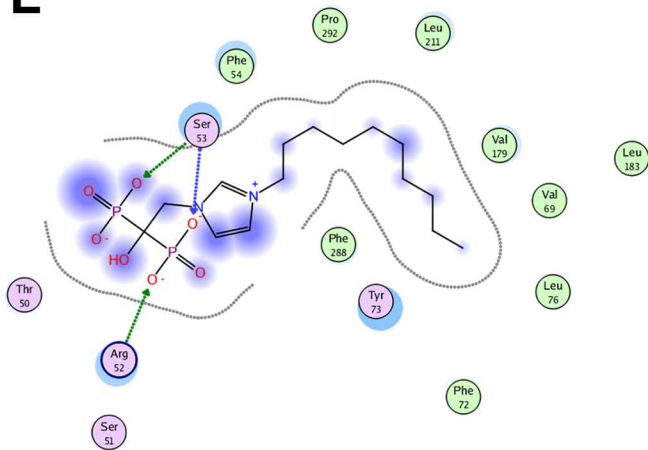**M**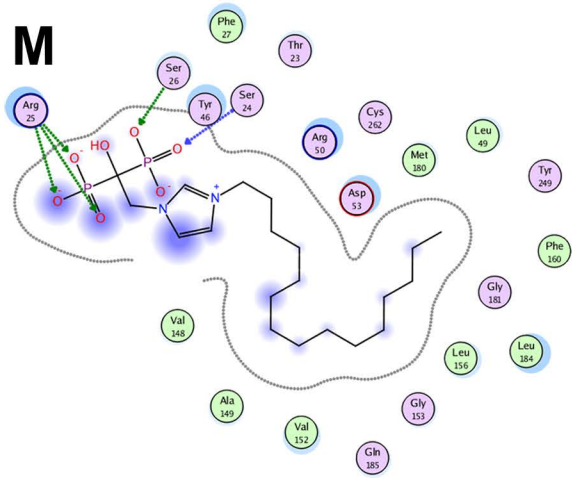**N**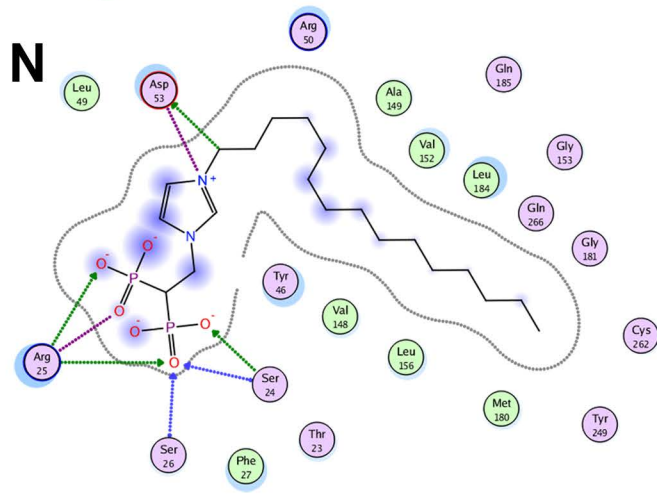

Supplement: ppat.1004114.s005.pdf [file ppat.1004114.s005.pdf]
